# Supplementary material for: Chronic kidney disease and reduced renal COX2 expression in xanthinuria: a case-control study
Source: Research Square preprint supplement (doi:10.21203/rs.3.rs-8652828/v1), 2026-02-18
Supplement: Supplementary file 1 [file 17d747115466c8e65c28fdae.docx]

**Material and Methods**

*Participants and study design*

Human kidney histological features and tubular COX2 expression were examined the biopsy of a patient with xanthinuria and chronic kidney disease (CKD) and compared to biopsies from healthy controls (n = 4) or CKD patients (n = 12). CKD biopsies were from patients diagnosed with diabetic nephropathy (n = 4), non-specific focal segmental glomerulosclerosis (FSGS) and/or interstitial fibrosis tubular atrophy (IFTA) (n = 4), and glomerulosclerosis of unidentified cause or attributed to hypertensive nephropathy (n = 4).

*Immunohistochemistry*

Paraffin-embedded human kidney biopsy sections of 4μm were dewaxed and hydrated before staining with Mason’s Trichrome or primary antibody anti-cyclooxygenase-2/COX2 (ab15191, 1:1000, Abcam, Cambridge, UK). Stained biopsy slides were scanned at a magnification of 200X using Leica Aperio Versa 200 scanner, visualized and analysed using image analysis software ImageScope from Leica. Quantification of glomerulosclerosis was assessed on routine whole Masson’s Trichrome stained slides by evaluating the ratio of sclerosed glomeruli to total glomeruli. Also using Mason’s Trichrome stained slides, tubulointerstitial fibrosis percentage was evaluated on up to ten randomly chosen fields at a magnification of 200X by manually identifying the areas positive for fibrosis over total field area. Quantification of COX2 staining was done by evaluating the ratio of COX2 positive tubules to total tubule number in up to ten high power fields at a magnification of 200X. All evaluations were done by an investigator blinded to the experimental conditions and confirmed by two pathologists.
