# Supplementary material for: Chronic kidney disease and reduced renal COX2 expression in xanthinuria: a case-control study
Source: Research Square preprint supplement (doi:10.21203/rs.3.rs-8652828/v1), 2026-02-18
Supplement: Supplementary file 2 [file 3e1f7dba92c2d45c9c1705f3.xlsx]

## Sheet: Feuil1
#Tissu bank	#image 20X	#total tubules	#COX2+ distal tubules	%COX2+ distal tubules	Mean %COX2+ distal tubules	#COX2+ proximal tubules	%COX2+ proximal tubules	Mean %COX2+ proximal tubules	%COX2+ tubules	Mean %COX2+ tubules			#Tissu bank	Diagnostic	Mean %COX2+ distal tubules	Mean %COX2+ distal tubules per group	Mean %COX2+ proximal tubules	Mean %COX2+ proximal tubules per group
14	1	38	1	2.63158	13.9221	19	50	40.6701	52.6316	54.5921			179	IFTA
	2	44	1	2.27273		16	36.3636		38.6364				136	IFTA FSGS	3.03504	7.87877	28.2459	30.5617
	3	28	3	10.7143		13	46.4286		57.1429				14	FSGS	13.9221		40.6701
	4	22	4	18.1818	Mean #COX2+ distal tubules	8	36.3636	Mean #COX2+ proximal tubules	54.5455	Mean #COX2+ tubules			62	FSGS	6.67919		22.7692
	5	19	2	10.5263	4.1	6	31.5789	12.6	42.1053	16.7			124	Diabetic nephropathy	3.58224	5.2564	10.3469	13.705
	6	37	5	13.5135		9	24.3243		37.8378				164	Diabetic nephropathy	8.86678		13.5708
	7	26	6	23.0769		18	69.2308		92.3077				214	Diabetic nephropathy	6.40243		10.9654
	8	32	10	31.25		10	31.25		62.5				225	Diabetic nephropathy	2.17416		19.9368
	9	32	5	15.625		15	46.875		62.5				196	Glomerulosclerosis IFTA	6.66509	6.84233	46.0323	40.3579
	10	35	4	11.4286		12	34.2857		45.7143				68	Glomerulosclerosis	6.98304		26.4052
62	1	25	0	0	6.67919	11	44	22.7692	44	29.4484			122	Glomerulosclerosis	10.1617		63.8405
	2	27	2	7.40741		21	77.7778		85.1852				260	Glomerulosclerosis	3.55945		25.1535
	3	22	2	9.09091	Mean #COX2+ distal tubules	11	50		59.0909				130	normal	9.72923	8.3893	33.8405	28.3037
	4	22	1	4.54545	2.3	0	0	6.1	4.54545	8.4			155	normal	17.8597		43.2869
	5	32	3	9.375		1	3.125		12.5				180	normal	0.746461		20.7259
	6	35	8	22.8571		0	0		22.8571				193	normal	5.22182		15.3613
	7	73	5	6.84932		0	0		6.84932				219	xanthinuria	8.51692		2.56098
	8	80	0	0		0	0		0
	9	49	0	0		3	6.12245		6.12245
	10	30	2	6.66667		14	46.6667		53.3333
68	1	56	4	7.14286	6.98304	2	3.57143	26.4052	10.7143	33.3882
	2	25	3	12		0	0		12
	3	24	5	20.8333	Mean #COX2+ distal tubules	10	41.6667		62.5
	4	39	0	0	2	0	0	7.25	0	9.25
	5	36	0	0		9	25		25
	6	28	1	3.57143		13	46.4286		50
	7	31	1	3.22581		11	35.4839		38.7097
	8	22	2	9.09091		13	59.0909		68.1818
122	1	48	2	4.16667	10.1617	13	27.0833	63.8405	31.25	74.0023
	2	27	3	11.1111		19	70.3704		81.4815
	3	35	3	8.57143		23	65.7143		74.2857
	4	33	4	12.1212	Mean #COX2+ distal tubules	25	75.7576	18.6667	87.8788	22
	5	17	0	0	3.33333	16	94.1176		94.1176
	6	32	8	25		16	50		75
				#DIV/0!			#DIV/0!		#DIV/0!
				#DIV/0!			#DIV/0!		#DIV/0!
				#DIV/0!			#DIV/0!		#DIV/0!
				#DIV/0!			#DIV/0!		#DIV/0!
124	1	46	3	6.52174	3.58224	0	0	10.3469	6.52174	13.9291
	2		0	0		0	0		0
	3	34	1	2.94118	Mean #COX2+ distal tubules	1	2.94118		5.88235
	4	29	1	3.44828	1.2	4	13.7931	2.4	17.2414	3.6
	5	20	1	5		7	35		40
				#DIV/0!			#DIV/0!		#DIV/0!
				#DIV/0!			#DIV/0!		#DIV/0!
				#DIV/0!			#DIV/0!		#DIV/0!
				#DIV/0!			#DIV/0!		#DIV/0!
				#DIV/0!			#DIV/0!		#DIV/0!
130	1	48	3	6.25	9.72923	16	33.3333	33.8405	39.5833	43.5698
	2	40	9	22.5		11	27.5		50
	3	40	3	7.5		6	15		22.5
	4	27	2	7.40741	Mean #COX2+ distal tubules	12	44.4444	10.8	51.8519	14.1
	5	26	1	3.84615	3.3	15	57.6923		61.5385
	6	30	7	23.3333		16	53.3333		76.6667
	7	29	4	13.7931		10	34.4828		48.2759
	8	33	3	9.09091		8	24.2424		33.3333
	9	33	0	0		3	9.09091		9.09091
	10	28	1	3.57143		11	39.2857		42.8571
136	1	39			3.03504			28.2459	17.5604	29.7219
	2	36	0	0		2	5.55556		5.55556
	3	29	0	0	Mean #COX2+ distal tubules	10	34.4828		34.4828
	4	26	0	0	0.75	22	84.6154	6.875	84.6154	7.625
	5	17							29.4118
	6	21	0	0		7	33.3333		33.3333
	7	33	1	3.0303		3	9.09091		12.1212
	8	32	2	6.25		0	0		6.25
	9	20	3	15		4	20		35
	10	18	0	0		7	38.8889		38.8889
155	1	33	4	12.1212	17.8597	17	51.5152	43.2869	63.6364	61.1466
	2	40	13	32.5		16	40		72.5
	3	43	6	13.9535		19	44.186		58.1395
	4	46	8	17.3913	Mean #COX2+ distal tubules	21	45.6522	19	63.0435	26.875
	5	40	13	32.5	7.875	15	37.5		70
	6	40	5	12.5		21	52.5		65
	7	44	4	9.09091		20	45.4545		54.5455
	8	78	10	12.8205		23	29.4872		42.3077
164	1	22	3	13.6364	8.86678	0	0	13.5708	13.6364	22.4375
	2	18	1	5.55556	Mean #COX2+ distal tubules	3	16.6667		22.2222
	3	33	7	21.2121	2.28571	5	15.1515		36.3636
	4	21	2	9.52381		4	19.0476	3.14286	28.5714	5.42857
	5	26	1	3.84615		6	23.0769		26.9231
	6	19	1	5.26316		4	21.0526		26.3158
	7	33	1	3.0303		0	0		3.0303
179	1	43		0	0		0	0	55.814	55.6051
	2	32		0			0		21.875
	3	26		0			0		84.6154
	4	31		0			0		93.5484
	5	32		0			0		50
	6	36		0			0		27.7778
180	1	30	0	0	0.746461	3	10	20.7259	10	21.4724
	2	25	0	0		1	4		4
	3	21	1	4.7619	Mean #COX2+ distal tubules	5	23.8095		28.5714
	4	40	0	0	0.2	20	50	7.1	50	7.3
	5	39	0	0		15	38.4615		38.4615
	6	37	1	2.7027		5	13.5135		16.2162
	7	44	0	0		5	11.3636		11.3636
	8	30	0	0		4	13.3333		13.3333
	9	20	0	0		3	15		15
	10	36	0	0		10	27.7778		27.7778
193	1	28	1	3.57143	5.22182	2	7.14286	15.3613	10.7143	20.5831
	2	20	2	10		1	5		15
	3
	4
	5	39	3	7.69231	Mean #COX2+ distal tubules	6	15.3846		23.0769
	6	34	1	2.94118	1.42857	8	23.5294	4.57143	26.4706	6
	7	35	0	0		4	11.4286		11.4286
	8	25	2	8		8	32		40
	9	23	1	4.34783		3	13.0435		17.3913
196	1	16	1	6.25	6.66509	8	50	46.0323	56.25	43.4516
	2	16	3	18.75		4	25		43.75
	3
	4	20	0	0		9	45		45
	5	35			Mean #COX2+ distal tubules			8.83333	8.57143	10
	6	35			1.16667				22.8571
	7	17	2	11.7647		13	76.4706		88.2353
	8	21	0	0		12	57.1429		57.1429
	9	31	1	3.22581		7	22.5806		25.8065
	10
214	1	15	3	20	6.40243	3	20	10.9654	40	17.3678
	2	19	1	5.26316		4	21.0526		26.3158
	3	22	1	4.54545		4	18.1818		22.7273
	4	13	0	0	Mean #COX2+ distal tubules	1	7.69231	2	7.69231	3
	5	18	0	0	1	0	0		0
	6	12	1	8.33333		0	0		8.33333
	7	17	1	5.88235		0	0		5.88235
	8	22	0	0		5	22.7273		22.7273
	9	20	2	10		2	10		20
	10	10	1	10		1	10		20
219	1	16	0	0	8.51692	0	0	2.56098	0	11.0779
	2	27	0	0		0	0		0
	3	17	2	11.7647	Mean #COX2+ distal tubules	0	0		11.7647
	4	33	2	6.06061	2.14286	1	3.0303	0.714286	9.09091	2.85714
	5	29	4	13.7931		2	6.89655		20.6897
	6	21	0	0		0	0		0
	7	25	7	28		2	8		36
225	1	19	1	5.26316	2.17416	5	26.3158	19.9368	31.5789	22.111
	2	15	0	0		0	0		0
	3	34	0	0		2	5.88235		5.88235
	4	26	1	3.84615	Mean #COX2+ distal tubules	4	15.3846		19.2308
	5	24	1	4.16667	0.5	10	41.6667	4.6	45.8333	5.1
	6	21	1	4.7619		10	47.619		52.381
	7	27	1	3.7037		0	0		3.7037
	8	16	0	0		0	0		0
	9	24	0	0		8	33.3333		33.3333
	10	24	0	0		7	29.1667		29.1667
260	1	36	2	5.55556	3.55945	16	44.4444	25.1535	50	28.7129
	2	26	1	3.84615		9	34.6154		38.4615
	3	26	3	11.5385	Mean #COX2+ distal tubules	21	80.7692		92.3077
	4	28	0	0	1	4	14.2857	7	14.2857
	5	31	1	3.22581		5	16.129		19.3548	8
	6	33	0	0		0	0		0
	7	27	0	0		4	14.8148		14.8148
	8	21	1	4.7619		5	23.8095		28.5714
	9	25	0	0		4	16		16
	10	30	2	6.66667		2	6.66667		13.3333
